# Supplementary material
Source: ML conference proceedings conference paper supplement (https://openreview.net/forum?id=YcTxVpRRf9)
Supplement: supplementary_material [file Readme_Process_Data_Simulator.pdf › Code/Data Simulator/Readme_Process_Data_Simulator.pdf]

1. Run “gaussian.py”, it outputs 6 files and folders, which can be used for computing the results.
